# Supplementary material for: Identifying a living great-grandson of the Lakota Sioux leader Tatanka Iyotake (Sitting Bull)
Source: PubMed Central journal article supplement — Sci Adv. 2021 Oct 27;7(44):eabh2013. doi: 10.1126/sciadv.abh2013 (PMC8550246; doi:10.1126/sciadv.abh2013), 2021-10-27
Supplement: sciadv.abh2013_sm.pdf [file sciadv.abh2013_sm.pdf]

Supplementary Materials for

**Identifying a living great-grandson of the Lakota Sioux leader  
Tatanka Iyotake (Sitting Bull)**

Ida Moltke, Thorfinn Sand Korneliussen, Andaine Seguin-Orlando, J. Víctor Moreno-Mayar,  
Ernie LaPointe, William Billeck, Eske Willerslev\*

\*Corresponding author. Email: ew482@cam.ac.uk

Published 27 October 2021, *Sci. Adv.* 7, eabh2013 (2021)  
DOI: 10.1126/sciadv.abh2013

**This PDF file includes:**

Figs. S1 to S4  
Tables S1 and S2

## Supplementary Figures and Tables

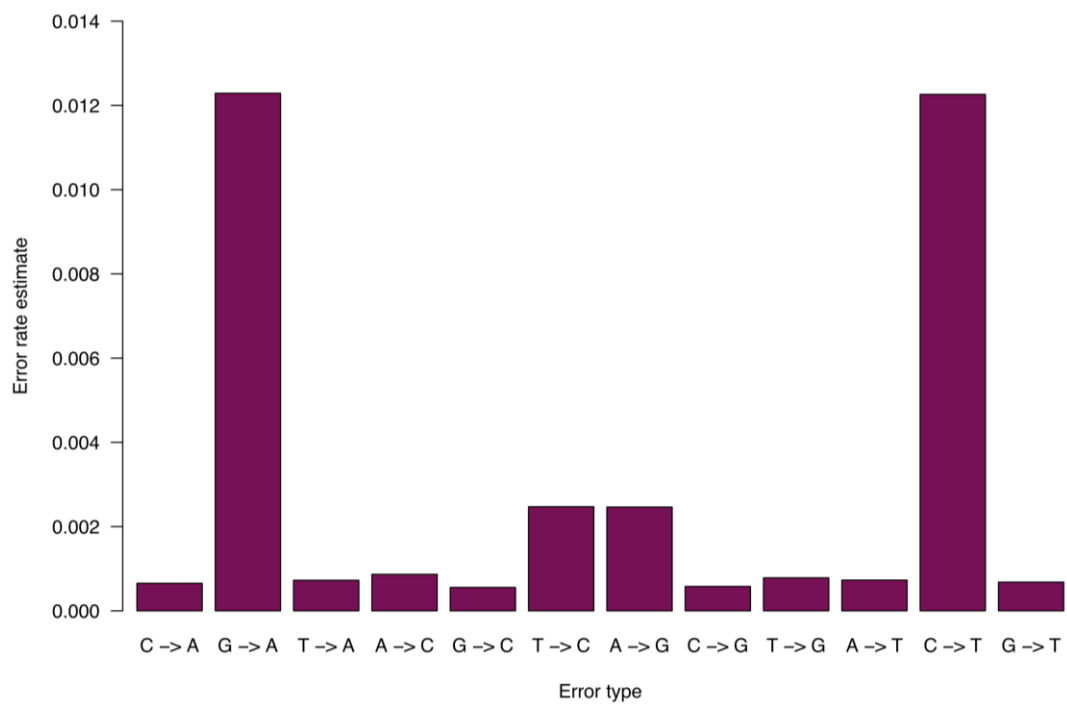

**Fig. S1. Error rate estimates for the Sitting Bull sequencing data for each possible error type.**

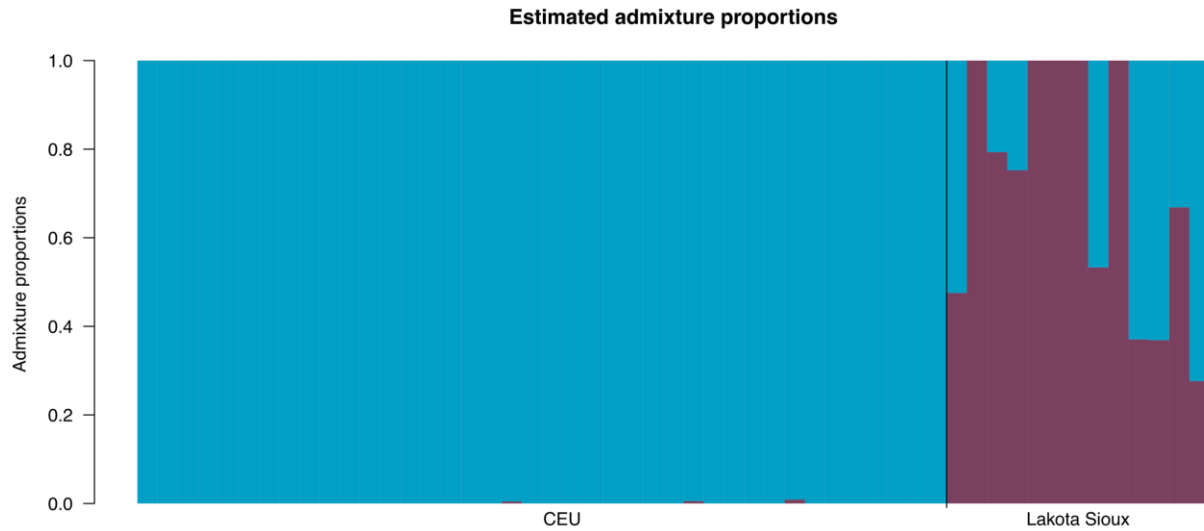

**Fig. S2. Results of an ADMIXTURE analysis of SNP chip data from 13 Lakota Sioux individuals merged with data from 40 European individuals from the 1000 Genomes project.** The analysis was performed assuming the number of ancestral populations,  $K$ , is 2. Ernie LaPointe is among the 5 Lakota Sioux individuals that are estimated to not have any European ancestry.

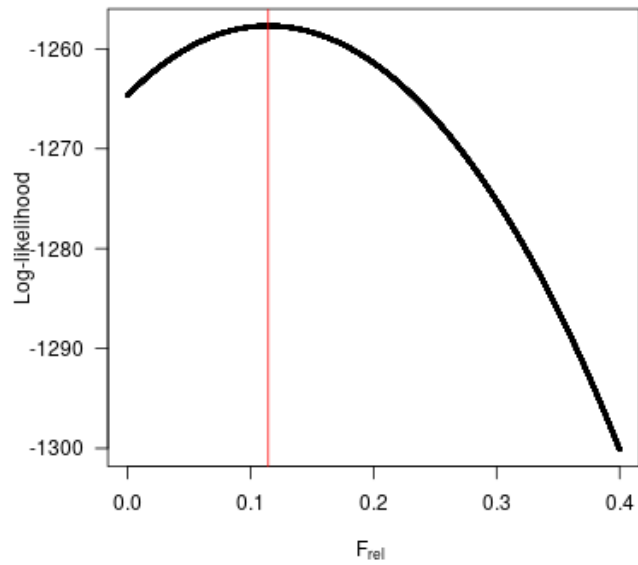

**Figure S3. Log-likelihood curve for  $F_{rel}$  when analysing data from Ernie LaPointe.** The black curve shows the log-likelihood for  $F_{rel}$  values ranging from 0 to 0.4. The red vertical line indicates the value of  $F_{rel}$  that maximizes the log-likelihood.

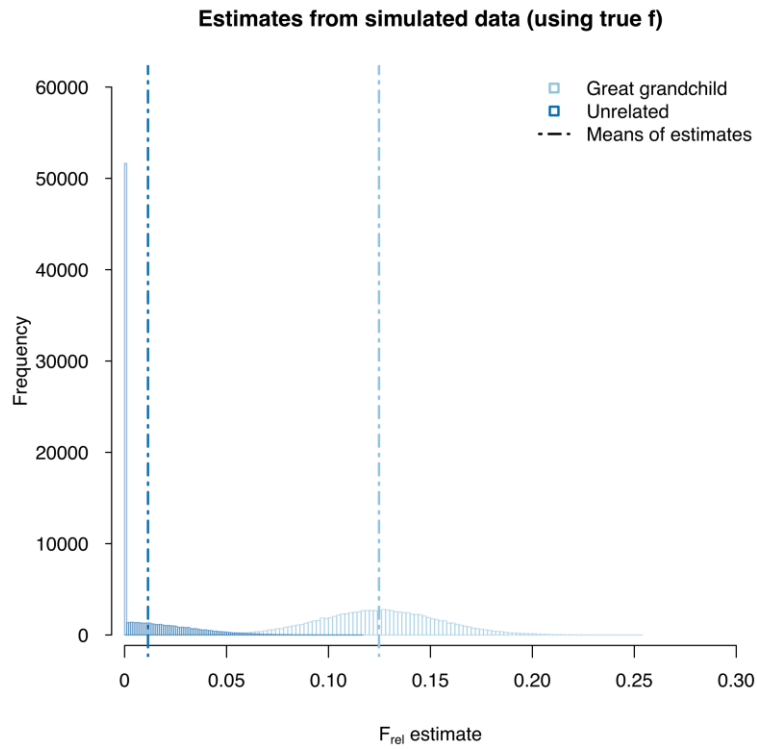

**Fig. S4. Simulation results based on data from the same number SNPs on average as in the real data analyses.** Estimates of  $F_{rel}$  obtained using the true underlying allele frequencies that the simulations were based on.

|                                     |                                        |                                                   |                                            |                                                                                                         |                                          |
|-------------------------------------|----------------------------------------|---------------------------------------------------|--------------------------------------------|---------------------------------------------------------------------------------------------------------|------------------------------------------|
| Sitting Bull's Wives                | Light Hair (?-1857), married 1851-1857 | Snow on Her (ca. 1829-1893) married ca. 1860-1870 | Red Woman (ca. 1840-1871) married ca. 1860 | <b>Seen by Her Nation (1848-1897)</b> married 1872-1890                                                 | Four Robes (1850-1829) married 1872-1890 |
| Sitting Bull's Children             | One, deceased                          | Several, all deceased                             | One, deceased                              | Two, both deceased, including the grandmother of Ernie LaPointe <b>Standing Holy (1876-1927)</b>        | Several, all deceased                    |
| Sitting Bull's Grand-children       | None                                   | Several, all deceased                             | None                                       | Several, all deceased, including the mother of Ernie LaPointe <b>Angeline Spotted Horse (1903-1959)</b> | Several, all deceased                    |
| Sitting Bull's Great Grand-children | None                                   | One known, deceased                               | None                                       | Several, living are <b>Ernie LaPointe</b> and his sister                                                | Several, all deceased                    |

**Table S1. Overview of Sitting Bull's wives and biological descendants through three generations and his relationship with Ernie LaPointe.** The latter, i.e. the family lineage related to Ernie LaPointe, is highlighted in bold.

| <b>Lakota Sioux individual</b> | <b><i>F<sub>rel</sub></i> estimate</b> |
|--------------------------------|----------------------------------------|
| Ernie LaPointe                 | 0.1143                                 |
| Reference individual 1         | 1e-12                                  |
| Reference individual 2         | 1e-12                                  |
| Reference individual 3         | 0.001997                               |
| Reference individual 4         | 1e-12                                  |

**Table S2.** *F<sub>rel</sub>* estimates obtained for Ernie LaPointe and the four reference individuals.
